# Supplementary material for: Paternal Depressive Symptoms and Parenting Behaviors: An Updated Meta-Analysis
Source: Springer Nature journal article supplement (doi:10.1007/s10826-018-01316-1), 2019-01-04
Supplement: MOESM1 [file 16378650]

Supplementary Table 1

*Characteristics of Studies Included in the Analysis of the Degree of Association Between Paternal Depressive Symptoms and Positive Parenting Behaviors (Research Question One)*

| Study | *N* | Pub statusc | | Country of study | Parenting outcomes | Parenting measure | *r* | 95% CI | ESW |
| --- | --- | --- | --- | --- | --- | --- | --- | --- | --- |
| Aunola et al. (2015) | 118 | | P | Finland | Affection | CRPR | –.09 | –.27, .09 | 2.26 |
| Bumpus (2000) | 178 | | U | US | Acceptance | CRPBI | .01 | –.14, .16 | 2.74 |
| Carbray et al. (1993) | 28 | | U | US | Warmth and cohesion | FES | –.40 | –.60, –.14 | 1.36 |
| Conger et al. (1992 & 1995) - IYFP Sample | 205 | | P | US | Low hostility; Nurturance | Observation | –.01 | –.11, .09 | 3.55 |
| Conger et al. (1993) | 220 | | P | US | Involvement; Low hostility; Nurturance | Observation | –.01 | –.10, .08 | 3.61 |
| Cummings et al. (2005) | 235 | | P | US | Emotional availability (positive parenting, warmth) | APQ: Positive Parenting Subscale; PARQ: Warmth and Affection Subscale | –.11 | –.24, .01 | 3.04 |
| Manuscript | *N* | | Pub statusc | Country of study | Parenting outcomes | Parenting measure | *r* | 95% CI | ESW |
| Davies et al. (2004) | 227 | | P | US | Acceptance | PARQ: Warmth and Affection Subscale | –.26 | –.29, –.04 | 3.00 |
| Dette-Hagenmeyer & Reichle (2014) | 161 | | P | Germany | Positive parenting behaviors | GEAPQ-P-ES: Positive Parenting Subscale | –.17 | –.32, –.02 | 2.62 |
| Devall (1990) | 33-79 | | U | US | Nurturance | CRPS | –.23 | –.38, –.07 | 2.45 |
| Du Rocher Schudlich (2004) | 267 | | U | US | Acceptance; Autonomy | CRPBI: Parent version | –.09 | –.17, .00 | 3.75 |
| Engle & McElwein (2013) | 549 | | P | US | Sensitive scaffolding | Observation | –.13 | –.21, –.05 | 3.78 |
| Formoso (2002) | 115 | | U | US | Engagement (acceptance, involvement, monitoring) | CRPBI; SPMS | –.20 | –.32, –.07 | 3.00 |
| Franck & Buehler (2007) | 416 | | P | US | Warmth | IFIRS: Observational coding scales | –.18 | –.27, –.09 | 3.57 |
| Gartstein & Fagot (2003) | 159 | | P | US | Cognitive guidance | Gauvain and Fagot’s PSCS | –.08 | –.23, .08 | 2.61 |
| Manuscript | *N* | | Pub statusc | Country of study | Parenting outcomes | Parenting measure | *r* | 95% CI | ESW |
| Harold et al. (2011) | 156-403 | | P | UK | Warmth | IYFP FIRS: Warmth and Hostility subscales | –.27 | –.35, –.19 | 3.79 |
| Harvey et al. (2011) | 108 | | P | US | Warmth | Audiotape | .03 | –.16, .22 | 2.16 |
| Iowa Adolescence Projecta | 198-382 | | U | US | Monitoring; Nurturance | CRPBI | –.06 | –.11, .00 | 4.22 |
| Johnson (2012) | 550-553 | | U | US | Warmth and support | Scaled developed by author | –.13 | –.19, –.07 | 4.15 |
| Kashdan et al. (2004) | 41 | | P | US | Warmth and positive involvement | PCRQ | –.14 | –.43, .18 | 1.11 |
| Kovacs (2003) | 76 | | U | US | Acceptance; Positive involvement; Warmth | APQ; CRPBI; Observation | –.08 | –.18, .02 | 3.47 |
| MacMartin (1997) | 136 | | U | Canada | Supportive parenting | PDI | –.35 | –.49, –.19 | 2.43 |
| McKee (2002) | 27 | | U | US | Affection (and praise) | PS | –.24 | –.57, .15 | 0.77 |
| Medeiros et al. (2016)b | 243 | | P | Portugal | Mindful parenting | IM-P | –.39 | –.49, –.28 | 3.08 |
| Middleton et al. (2009) | 37 | | P | US | Autonomy granting involvement | PCRI | .14 | –.19, .44 | 1.02 |
| Manuscript | *N* | | Pub statusc | Country of study | Parenting outcomes | Parenting measure | *r* | 95% CI | ESW |
| Onatsu-Arvilommi et al. (1998) | 54 | | P | Finland | Affection; Autonomy; Cognitive guidance; Monitoring | CRPR | –.23 | –.47, .04 | 1.38 |
| Papp et al. (2005) | 269 | | P | US | Acceptance; Autonomy | PBI | –.21 | –.32, –.09 | 3.18 |
| Ponnet (2014) | 798 | | P | Belgium | Positive parenting | PBS | –.24 | –.30, –.17 | 4.00 |
| Rice et al. (2013)b | 61-199 | | P | UK | Verbal positivity, positive engagement, parental warmth | PASQ | –.35 | –.43, –.28 | 3.77 |
| Roggman et al. (2002) | 59 | | P | US | Engagement | Observation | –.37 | –.57, –.13 | 1.47 |
| Simons et al. (1990) | 63 | | P | US | Constructive parenting | Observation | –.22 | –.44, .03 | 1.54 |
| Singley et al. (2017) | 456 | | P | US | Attunement and warmth; Engagement | PIWIS | –.19 | –.28, –.10 | 3.64 |
| Wheeler et al. (2011) | 239 | | P | US | Warmth | CRPBI | –.24 | –.32, –.15 | 3.67 |
| White et al. (2009) | 570 | | P | US | Acceptance | CRPBI | –.14 | –.20, –.08 | 4.16 |
| Wilson (2012) | 130 | | U | US | Involvement; Positivity | Lab-PAB Scales | –.08 | –.24, .10 | 2.38 |
| Wong et al. (2014) | 287 | | P | US | Supportive parenting | IPPA | –.09 | –.20, .03 | 3.24 |
|  |  | *I2* | | *tau2* | *Q*(df) |  | *r* | 95% CI | *p-value* |
| Summary Effect | | 73.68 | | 0.01 | 129.16(34), *p* < .001 |  | –.16 | –.20, –.13 | < .001 |
| Trimmed Summary Effect | | 62.92 | | 0.01 | 83.31(32), *p* < .001 |  | –.15 | –.18, –.11 | < .001 |

*Note.* APQ = Alabama Parenting Questionnaire; CI = confidence intervals; CRPBI= Children’s Report of Parental Behavior Inventory; CRPR = Block’s Child Rearing Practices Report – Finnish Version; CRPS = Child Rearing Practices Scale (modified version); ESW = effect size weighting; FES = Family Environment Scale; GEAPQ-P-ES = German extended version of the Alabama Parenting Questionnaire for Elementary School Age Children; *I2* = *I2* statistic; IFIRS = Iowa Family Interaction Rating Scales; IM-P = Interpersonal Mindfulness in Parenting Scale (Portuguese version); IPPA = Inventory of Parent and Peer Attachment; IYFP = Iowa Youth and Families Project; IYFP FIRS = Iowa Youth and Families Project Family Interaction Rating Scales; *k* = number of effect sizes; Lab-PAB Scales = Laboratory Parenting Assessment Battery; PARQ = Parental Acceptance–Rejection Questionnaire; PASQ = Parental Affiliative Style Questionnaire; PBI = Parental Behavior Inventory; PBS = Parental Behavior Scale; PCRI = Parent-Child Relationship Inventory; PCRQ = Parent-Child Relationship Questionnaire; PDI = Parenting Dimensions Inventory; PIWIS = Paternal Involvement with Infants Scale; PS = The Parenting Scale; PSCS = Problem-Solving Code System; *Q*(df)= *Q* statistic (degrees of freedom); *r* =Pearson product-moment correlation coefficient; SPMS = The Small Parental Monitoring Scale; *tau2* = *tau2* statistic.

aMaythew (1997) & Yang (1997). bManuscripts were identified as potential outliers and not included in the trimmed summary effect size distribution. cPub status = Publication status (P = Published; U = Unpublished)
