# Supplementary material for: Paternal Depressive Symptoms and Parenting Behaviors: An Updated Meta-Analysis
Source: Springer Nature journal article supplement (doi:10.1007/s10826-018-01316-1), 2019-01-04
Supplement: MOESM2 [file 16378650]

Supplementary Table 2

*Characteristics of Studies Included in the Analysis of the Degree of Association Between Paternal Depressive Symptoms and Negative Parenting Behaviors (Research Question Two)*

| Study | *N* | Pub statusb | Country of study | Parenting outcomes | Parenting measure | *r* | 95% CI | ESW |
| --- | --- | --- | --- | --- | --- | --- | --- | --- |
| Arnold (2016) | 554 | U | US | Hostile | IFIRS: Observational coding scales | .27 | .19, .35 | 5.12 |
| Aunola et al. (2015) | 118 | P | Finland | Psychological control | CRPR | .21 | .03, .38 | 3.06 |
| Conger et al. (1992 & 1995) - IYFP Sample | 196 | P | US | Inconsistent/harsh discipline | Observation, Parent Interview | .18 | .10, .26 | 5.17 |
| Conger et al. (1995) - OYS Sample | 63 | P | US | Inconsistent/harsh discipline | Observation, Parent Interview | .23 | .06, .39 | 3.12 |
| Cummings et al. (2005) | 235 | P | US | Psychological control | CRPBI | .17 | .04, .29 | 4.11 |
| Davies et al. (2004) | 227 | P | US | Inconsistent discipline | APQ: Inconsistent discipline subscale | .19 | .00, .26 | 4.07 |
| de Leon Siantz & Smith (1994) | 161 | P | US | Rejection | PARQ: Warmth and Affection Subscale | .26 | .00, .49 | 1.92 |
| Study | *N* | Pub statusb | Country of study | Parenting outcomes | Parenting measure | *r* | 95% CI | ESW |
| Dette-Hagenmeyer & Reichle (2014)a | 119 | P | Germany | Inconsistent discipline | GEAPQ-P-ES: Inconsistent discipline subscale | .39 | .25, .51 | 3.55 |
| Epkins & Harper (2016) | 159 | P | US | Hostility; Low warmth; Negativity; Rejection | PARQ/Control Questionnaire | .16 | .03, .28 | 4.11 |
| Gartstein & Fagot (2003) | 137 | P | US | Coercion | Fagot Interactive Code | –.06 | –.21, .10 | 3.53 |
| Guimond et al. (2012) | 403 | P | Canada | Hostile; Overprotection | PACOTIS | .12 | –.05, .28 | 3.30 |
| Harold et al. (2011) | 112-125 | P | UK | Hostile | IYFP FIRS: Warmth and Hostility subscales | .27 | .19, .35 | 5.12 |
| Harvey et al. (2011) | 41 | P | US | Laxness; Negative affect; Over-reactivity | Audiotape; PS | .08 | –.10, .25 | 3.09 |
| Kashdan et al. (2004) | 76 | P | US | Intrusiveness and negative discipline | PCRQ | .27 | –.04, .53 | 1.51 |
|  |  |  |  |  |  |  |  |  |
| Study | *N* | Pub statusb | Country of study | Parenting outcomes | Parenting measure | *r* | 95% CI | ESW |
| Kovacs (2003) | 527 | U | US | Harsh parenting; Inconsistent discipline; Negative involvement; Rejection | CRPBI; Observation | .11 | .01, .21 | 4.70 |
| Leinonen et al. (2002) | 449 | P | Finland | Non-involved; Punitive | CRPS | .08 | .02, .14 | 5.59 |
| Leung & Slep (2006) | 36 | P | US | Laxness; Over-reactivity | PS | .21 | .12, .30 | 4.92 |
| Marchand-Reilly (2012) | 59 | U | US | Laxness; Over-reactivity | PS | .44 | .13, .67 | 1.35 |
| McElwain & Volling (1999)a | 27 | P | US | Psychological control: Intrusiveness | Observation | –.21 | –.44, .05 | 1.99 |
| McKee (2002) | 54 | U | US | Laxness; Over-reactivity | PS | .46 | .10, .72 | 1.04 |
| Onatsu-Arvilommi et al. (1998) | 172 | P | Finland | Authoritarian control; Psychological control | CRPR | –.02 | –.21, .18 | 2.87 |
| Reeb (2012) | 331 | U | US | Hostile | IYFP FIRS: Hostility subscale | .07 | –.04, .17 | 4.61 |
| Rhoades et al. (2011) | 176 | P | US | Over-reactivity | PS: Over-reactivity subscale | .29 | .19, .39 | 4.57 |
| Study | *N* | Pub statusb | Country of study | Parenting outcomes | Parenting measure | *r* | 95% CI | ESW |
| Sethna et al. (2015) | 56 | P | UK | Negative affect; Psychological control | Observation: GRS | .00 | –.10, .10 | 4.63 |
| Simons et al. (1990) | 63 | P | US | Destructive parenting | Observation | .28 | .03, .49 | 2.09 |
| Williamson et al. (2017) | 179 | P | Canada | Negative parenting/ Laxness/  Over-reactivity | APQ; Observation; PS | .22 | .08, .36 | 3.71 |
| Wilson (2012) | 67-130 | U | US | Hostile; Intrusiveness; Over-permissive | Lab-PAB Scales | .20 | .00, .38 | 2.77 |
| Wong et al. (2014) | 287 | P | US | Harsh parenting | CRPBI | .14 | .02, .25 | 4.39 |
|  |  | *I2* | *tau2* | *Q*(df) |  | *r* | 95% CI | *p-value* |
| Summary Effect | | 66.91 | 0.01 | 81.60(27), *p* < .001 |  | .17 | .13, .21 | < .001 |
| Trimmed Summary Effect | | 64.22 | 0.01 | 61.07(25), *p* < .001 |  | .17 | .13, .21 | < .001 |

*Note.* APQ = Alabama Parenting Questionnaire; CI = confidence intervals; CRPBI= Children’s Report of Parental Behavior Inventory; CRPR = Block’s Child Rearing Practices Report – Finnish Version; CRPS = Child Rearing Practices Scale; ESW = effect size weighting; GEAPQ-P-ES = German extended version of the Alabama Parenting Questionnaire for Elementary School Age Children; GRS = Global Rating Scale; *I2* = *I2* statistic; IFIRS = Iowa Family Interaction Rating Scales; IYFP = Iowa Youth and Families Project; IYFP FIRS = Iowa Youth and Families Project Family Interaction Rating Scales; *k* = number of effect sizes; Lab-PAB Scales = Laboratory Parenting Assessment Battery; OYS = Oregon Youth Study; PACOTIS = Parental Cognitions and Conduct Toward the Infant Scale; PARQ = Parental Acceptance–Rejection Questionnaire; PCRQ = Parent–Child Relationship Questionnaire; PS = The Parenting Scale; *Q*(df) = *Q* statistic (degrees of freedom); *r* =Pearson product-moment correlation coefficient; *tau2* = *tau2* statistic.

aManuscripts were identified as potential outliers and not included in the trimmed summary effect size distribution. bPub status = Publication status (P = Published; U = Unpublished).
